# Supplementary material for: N-Nitrosamine-{cis-Re[CO]2}2+ cobalamin conjugates as mixed CO/NO-releasing molecules
Source: Royal Society of Chemistry journal article supplement (doi:10.1039/c5dt03402g), 2015-12-03
Supplement: c5dt03402g1.pdf [file c5dt03402g1.pdf]

**Supporting Information for**

**N-Nitrosamine- $\{\text{cis-Re}[\text{CO}]_2\}^{2+}$  Cobalamin Conjugates as Mixed  
CO/NO-Releasing Molecules.**

**Giuseppe Santoro,<sup>a</sup> Ruben Beltrami,<sup>b</sup> Emmanuel Kottelat,<sup>b</sup> Olivier Blacque,<sup>a</sup> Anna  
Bogdanova<sup>c</sup> and Fabio Zobi<sup>\*a</sup>**

*<sup>a</sup> Department of Chemistry, University of Zürich, Winterthurerstrasse 190, CH-8057 Zürich, Switzerland.*

*<sup>b</sup> Departement of Chemistry, University of Fribourg, Chemin du Musée 9, CH-1700 Fribourg, Switzerland.*

*<sup>c</sup> Institute of Veterinary Physiology, University of Zürich, Winterthurerstrasse 260, CH-8057 Zürich, Switzerland.*

## Figures and Tables:

**Table S1.** Crystal data and structure refinement for **1** and **1a**. (page S3)

**Figure S1.** <sup>1</sup>H-NMR spectrum of **3** in D<sub>2</sub>O. (page S5)

**Figure S2.** <sup>1</sup>H-NMR spectrum of **5** in D<sub>2</sub>O. (page S5)

**Figure S3.** HPLC chromatograms of species **1a- 3a**. (page S6)

**Figure S4.** UV-Vis of species **1a** in methanol. (page S6)

**Figure S5.** UV-Vis of species **2a** in methanol. (page S7)

**Figure S6.** UV-Vis of species **3a** in methanol. (page S7)

**Figure S7.** <sup>1</sup>H-NMR spectrum of **1a** in D<sub>2</sub>O. (page S8)

**Figure S8.** Right: Selected region (5.2-3.0 ppm) of NOESY 1D NMR, 2D COSY and 2D HMQC spectra of **1a**. (page S8)

**Figure S9.** IR spectrum of **1b** (KBr). (page S9)

**Figure S10.** IR spectrum of **2b** (KBr). (page S9)

**Figure S11.** IR spectrum of **3b** (KBr). (page S10)

**Figure S12.** UV-Vis of species **1b** in methanol. (page S10)

**Figure S13.** UV-Vis of species **2b** in methanol. (page S11)

**Figure S14.** UV-Vis of species **3b** in methanol. (page S11)

**Figure S15.** High-Resolution MS of **1b**. (page S12)

**Figure S16.** High-Resolution MS of **2b**. (page S13)

**Figure S17.** High-Resolution MS of **3b**. (page S14)

**Figure S18.** Typical spectrum changes on Mb assay of mixed CO/NO releasing molecules. Shown are the changes of **3b**. (page S15)

**Table S1.** Crystal data and structure refinement for **1** and **1a**.

|                                                |                                                     |                                                                  |
|------------------------------------------------|-----------------------------------------------------|------------------------------------------------------------------|
| CCDC number                                    | 1054820                                             | 1054821                                                          |
| Empirical formula                              | $C_{68}H_{93b}O_{N_{16}O_{15}P} \cdot 11(H_2O)$     | $2(C_{68}H_{93b}O_{N_{17}O_{16}P}) \cdot C_3H_6O \cdot 23(H_2O)$ |
| Formula weight                                 | 1664.67                                             | 3465.45                                                          |
| Temperature/K                                  | 183(1)                                              | 183(1)                                                           |
| Crystal system                                 | orthorhombic                                        | monoclinic                                                       |
| Space group                                    | $P2_12_12_1$                                        | $P2_1$                                                           |
| a/Å                                            | 16.2518(4)                                          | 15.6019(4)                                                       |
| b/Å                                            | 21.2575(8)                                          | 21.4078(4)                                                       |
| c/Å                                            | 25.0707(10)                                         | 28.0537(7)                                                       |
| $\alpha/^\circ$                                | 90                                                  | 90                                                               |
| $\beta/^\circ$                                 | 90                                                  | 95.299(2)                                                        |
| $\gamma/^\circ$                                | 90                                                  | 90                                                               |
| Volume/Å <sup>3</sup>                          | 8661.3(5)                                           | 9330.0(4)                                                        |
| Z                                              | 4                                                   | 4                                                                |
| $\rho_{calc}/cm^3$                             | 1.277                                               | 1.234                                                            |
| $\mu/mm^{-1}$                                  | 0.297                                               | 0.280                                                            |
| F(000)                                         | 3548.0                                              | 3692.0                                                           |
| Crystal size/mm <sup>3</sup>                   | 0.33 × 0.23 × 0.14                                  | 0.35 × 0.25 × 0.15                                               |
| Radiation                                      | MoK $\alpha$ ( $\lambda = 0.71073$ )                | MoK $\alpha$ ( $\lambda = 0.71073$ )                             |
| 2 $\Theta$ range for data collection/ $^\circ$ | 5.61 to 50.69                                       | 5.57 to 52.75                                                    |
| Index ranges                                   | -19 ≤ h ≤ 16, -25 ≤ k ≤ 25, -30 ≤ l ≤ 30            | -19 ≤ h ≤ 19, -26 ≤ k ≤ 26, -35 ≤ l ≤ 34                         |
| Reflections collected                          | 72378                                               | 85003                                                            |
| Independent reflections                        | 15847 [ $R_{int} = 0.0894$ , $R_{sigma} = 0.0911$ ] | 37195 [ $R_{int} = 0.0489$ , $R_{sigma} = 0.0730$ ]              |
| Data/restraints/parameters                     | 15847/483/949                                       | 37195/760/1927                                                   |
| Goodness-of-fit on F <sup>2</sup>              | 1.046                                               | 1.048                                                            |
| Final R indexes [ $I \geq 2\sigma(I)$ ]        | $R_1 = 0.1037$ , $wR_2 = 0.2782$                    | $R_1 = 0.0717$ , $wR_2 = 0.1836$                                 |
| Final R indexes [all data]                     | $R_1 = 0.1458$ , $wR_2 = 0.3167$                    | $R_1 = 0.0834$ , $wR_2 = 0.1928$                                 |

|                                             |            |            |
|---------------------------------------------|------------|------------|
| Largest diff. peak/hole / e Å <sup>-3</sup> | 0.68/-0.78 | 0.90/-0.64 |
| Flack parameter                             | 0.026(10)  | 0.049(6)   |

---

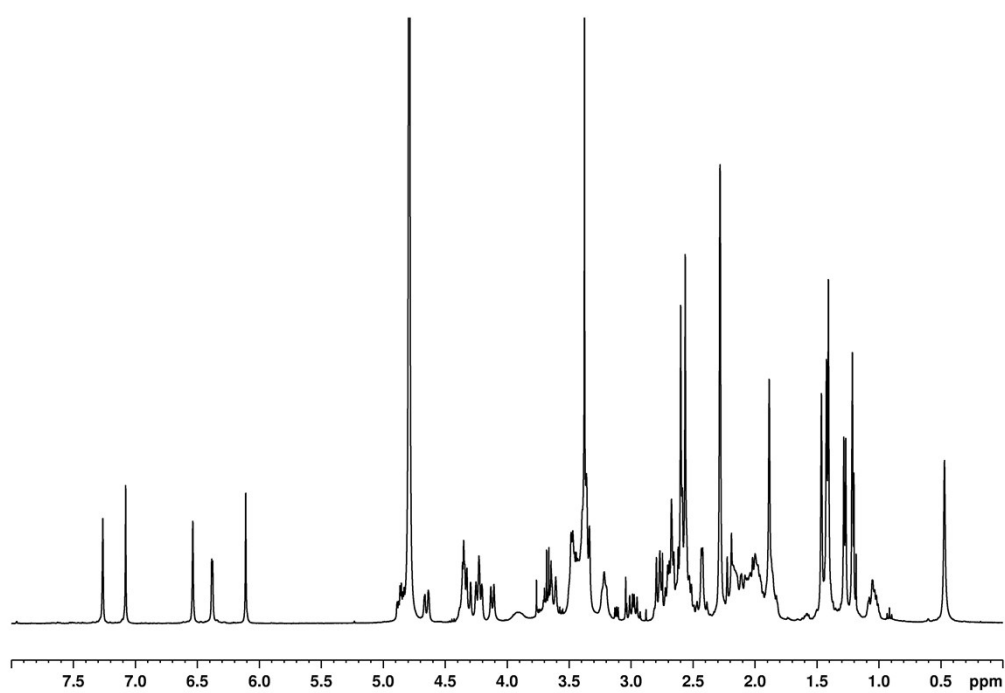

**Figure S1.** <sup>1</sup>H-NMR spectrum of **3** in D<sub>2</sub>O.

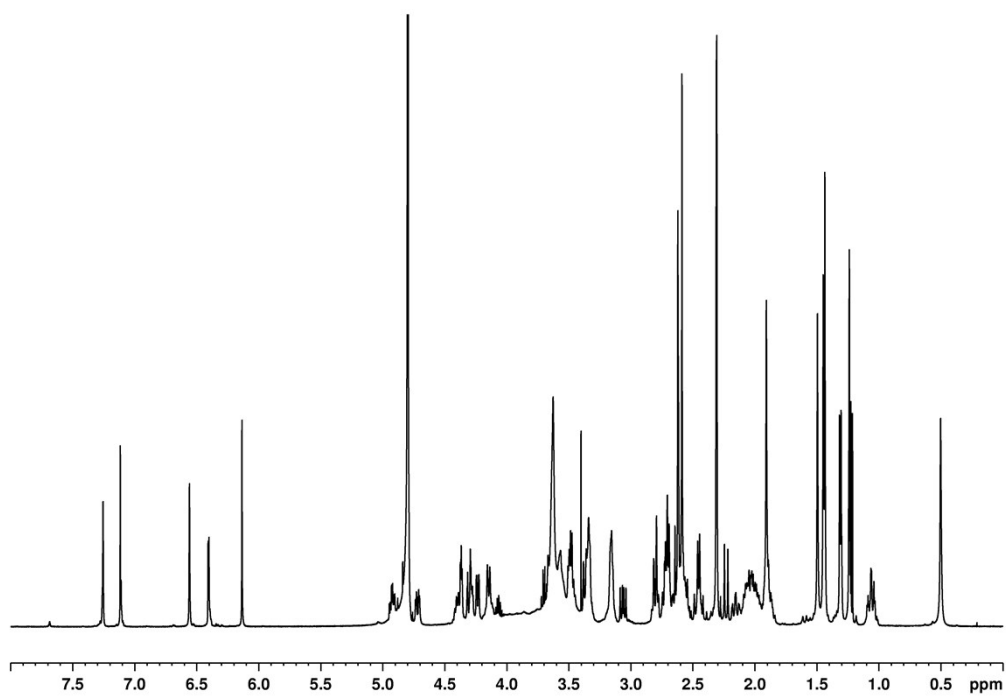

**Figure S2.** <sup>1</sup>H-NMR spectrum of **5** in D<sub>2</sub>O.

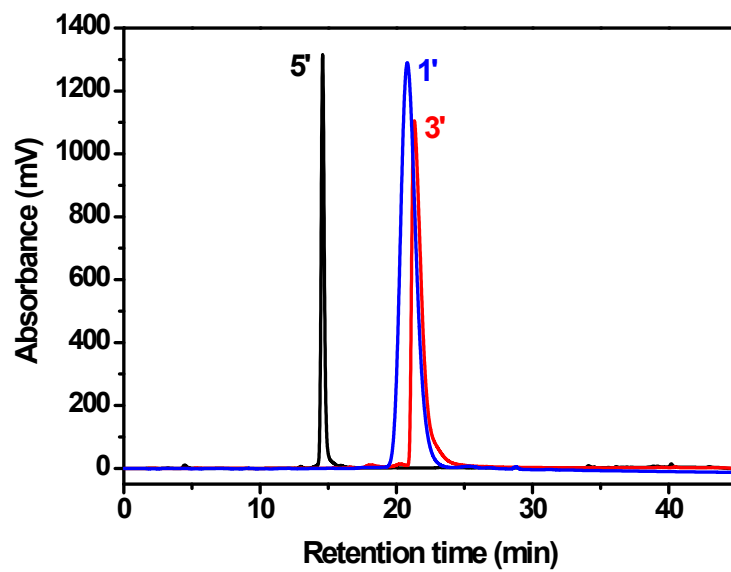

Figure S3. HPLC chromatograms of species 1a- 3a.

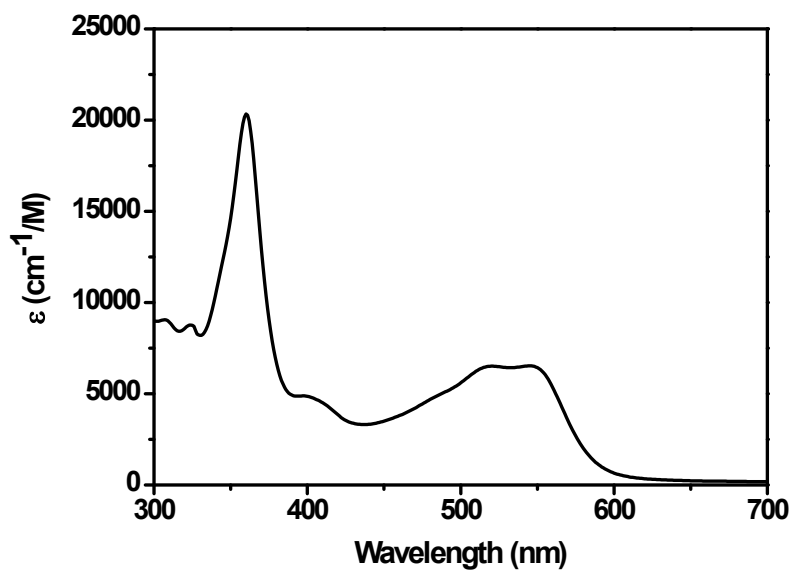

Figure S4. UV-Vis of species 1a in methanol.

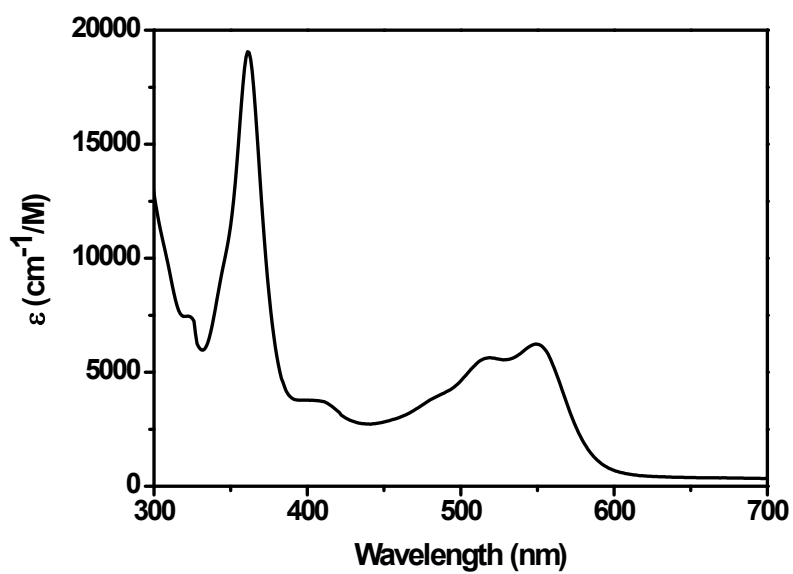

Figure S5. UV-Vis of species **2a** in methanol.

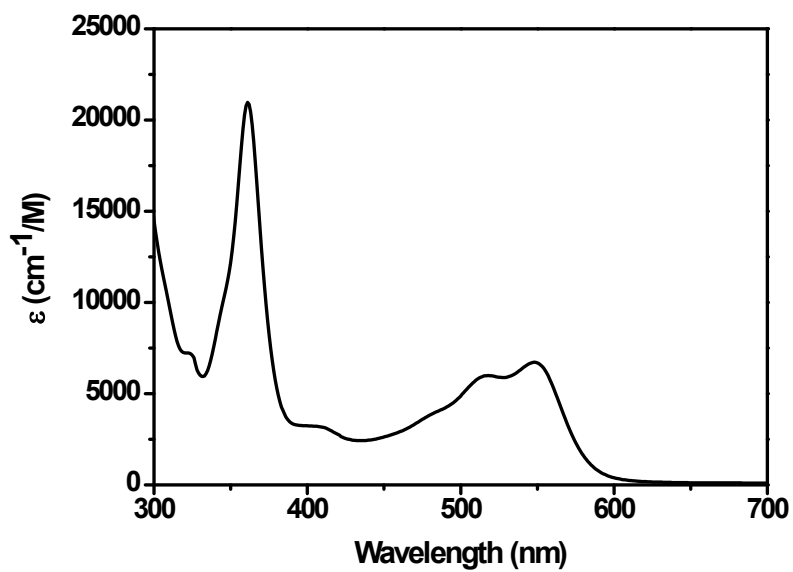

Figure S6. UV-Vis of species **3a** in methanol.

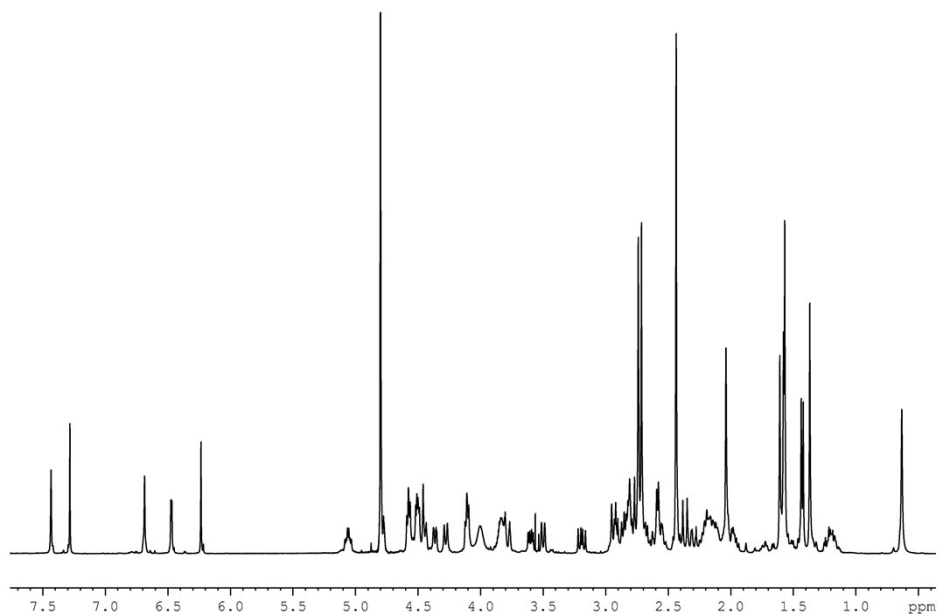

**Figure S7.**  $^1\text{H}$ -NMR spectrum of **1a** in  $\text{D}_2\text{O}$ .

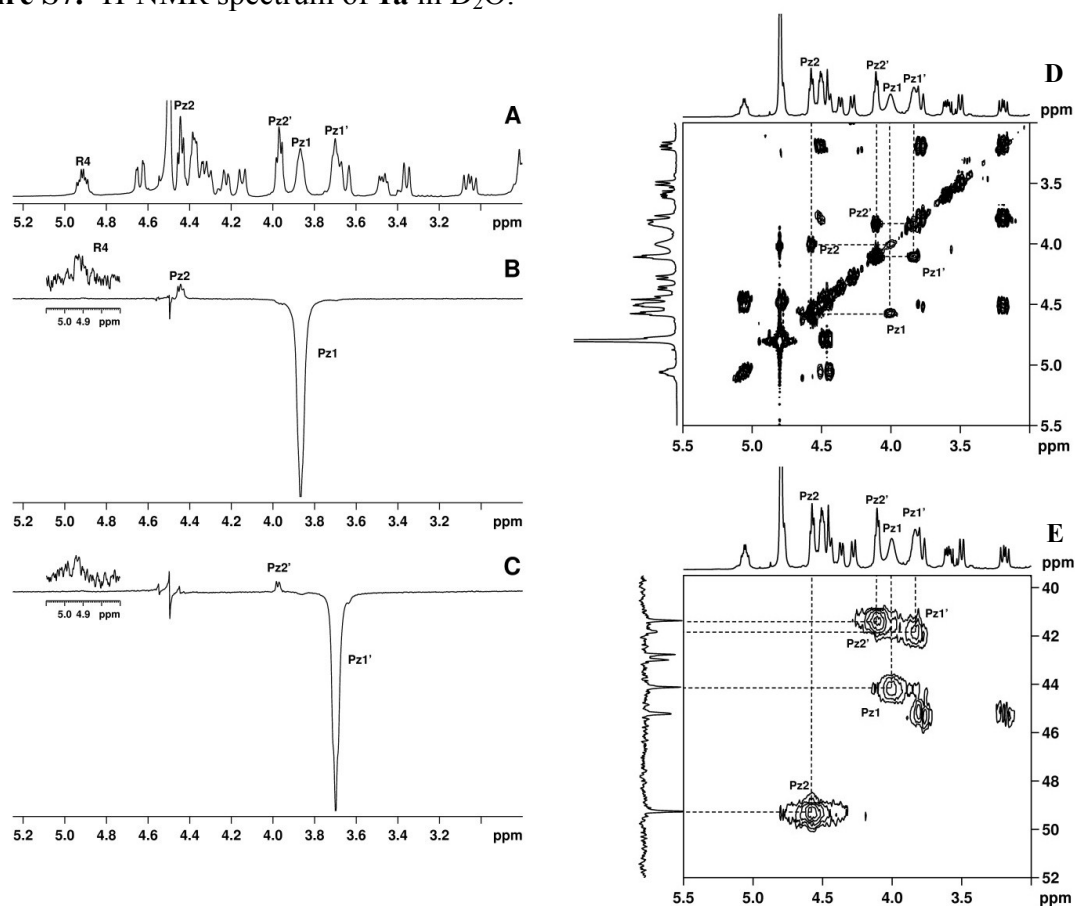

**Figure S8.** Right: Selected region (5.2-3.0 ppm) of NOESY 1D NMR spectra of **1a**. **A**: irradiation of Pz1 gives NOE effects on proton R4 and Pz2. **B**: Irradiation of Pz1a gives weak NOE effect on R4 and Pz2'. **C**: Irradiation of Pz1a gives weak NOE effect on R4 and Pz2'. Left: **D**: 2D COSY of **1a** highlighting the coupling between Pz1 and Pz2 and Pz1a and Pz2' but no cross correlation. **E**: 2D HMQC (5.5-3.0 ppm) of **1a**.



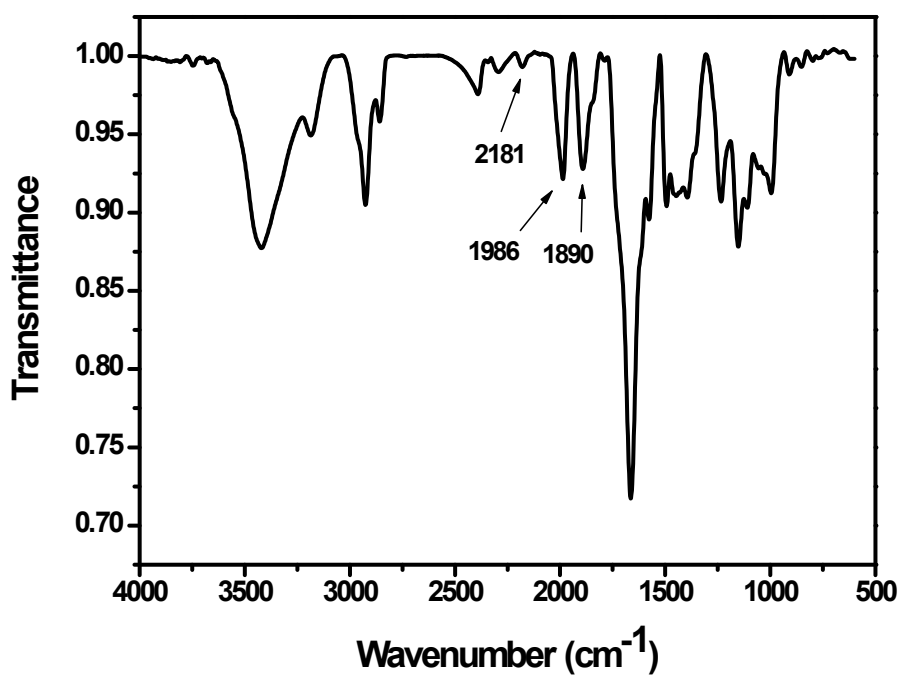

Figure S9. IR spectrum of **1b** (KBr).

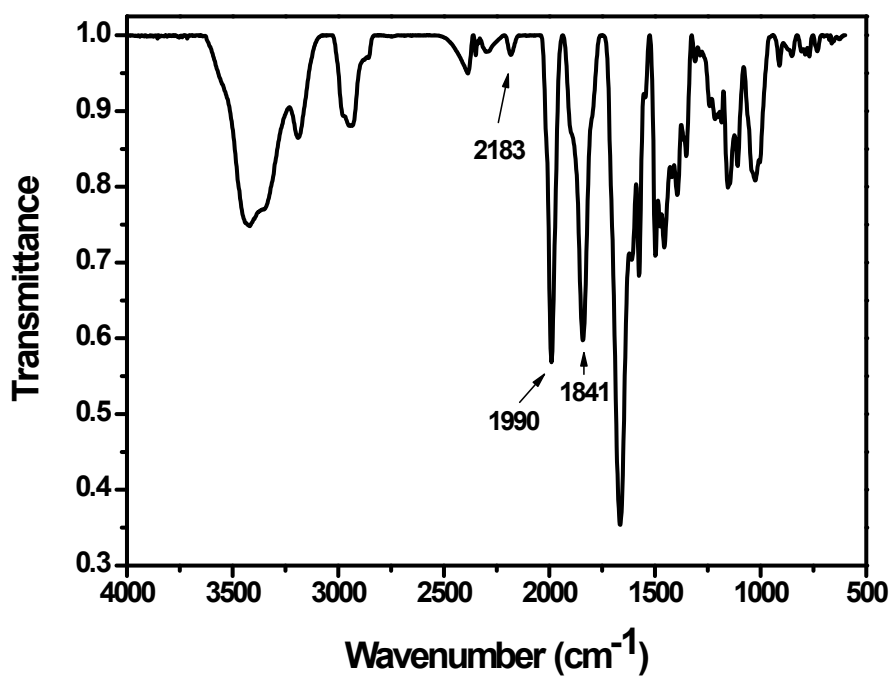

Figure S10. IR spectrum of **2b** (KBr).

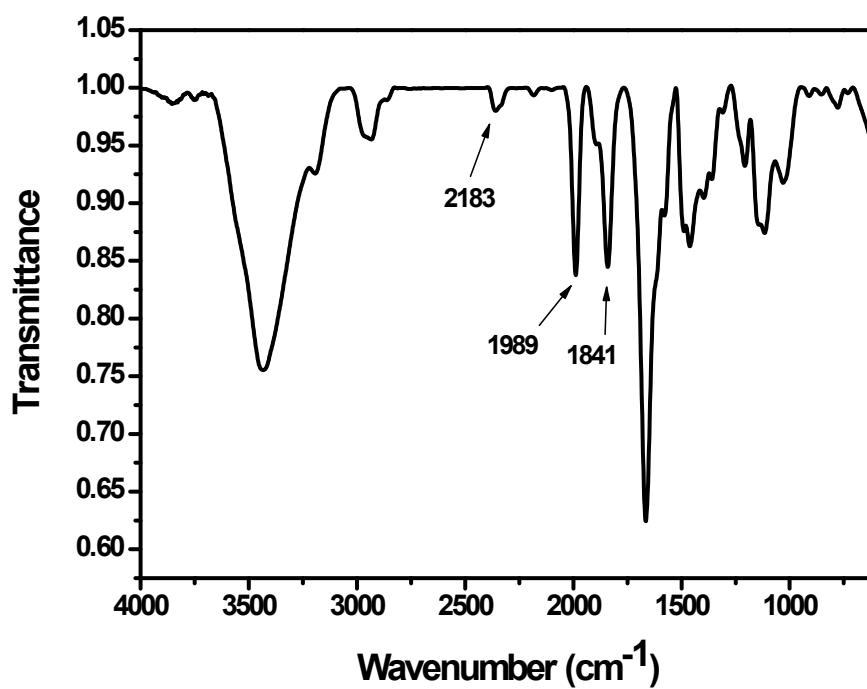

Figure S11. IR spectrum of **3b** (KBr).

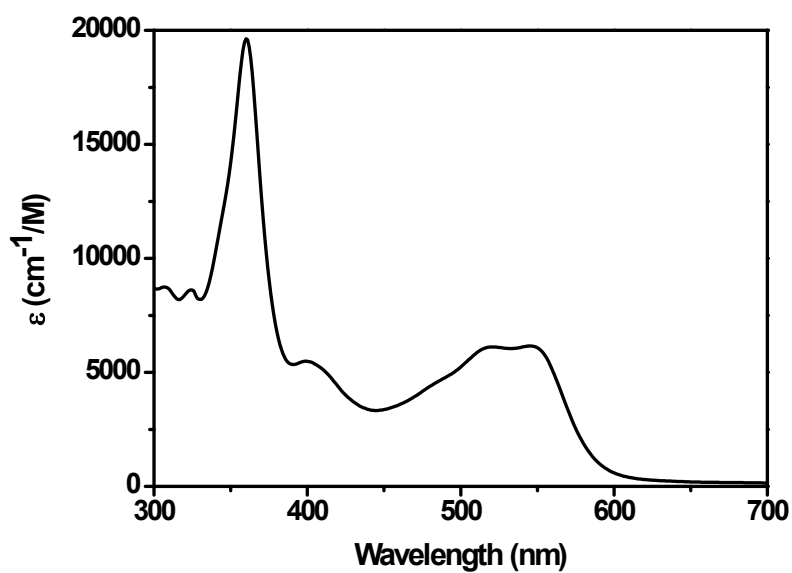

Figure S12. UV-Vis of species **1b** in methanol.

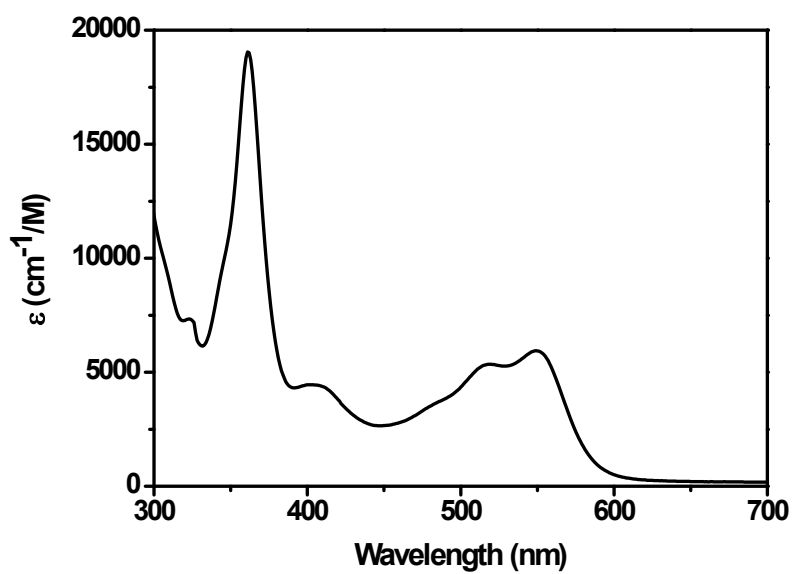

Figure S13. UV-Vis of species **2b** in methanol.

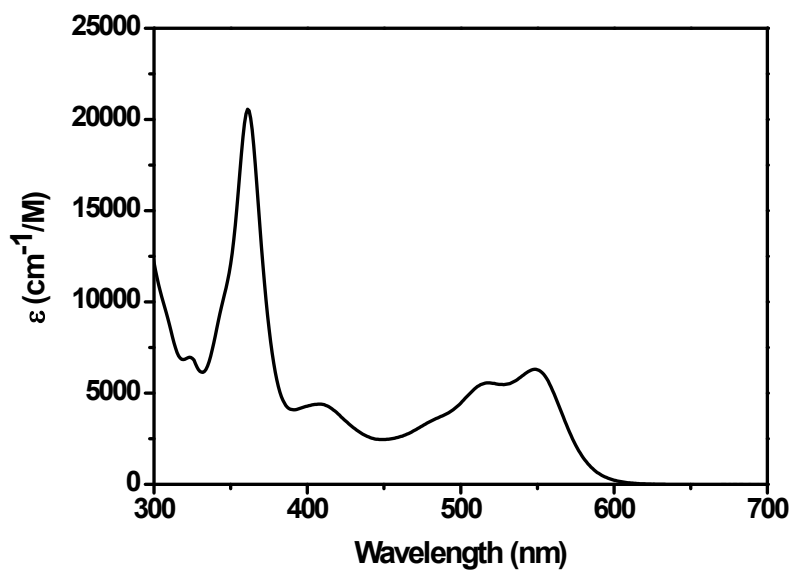

Figure S14. UV-Vis of species **3b** in methanol.

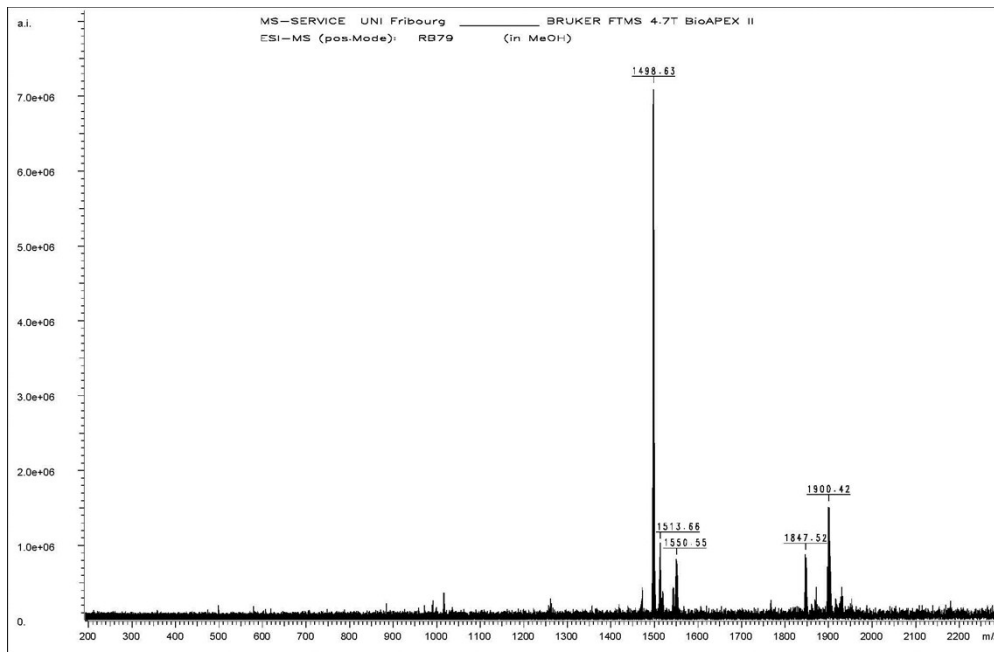

**UNI  
FR  
E**  
UNIVERSITÉ DE FRIBOURG  
UNIVERSITÄT FREIBURG

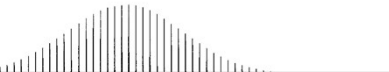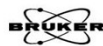

Mass Spectrometry Service  
Department of Chemistry

FTMS 4.7T BioAPEX II

RB79

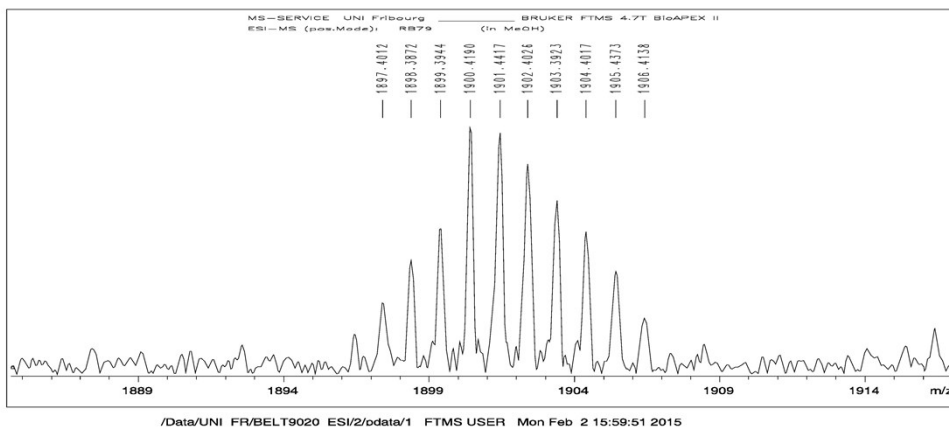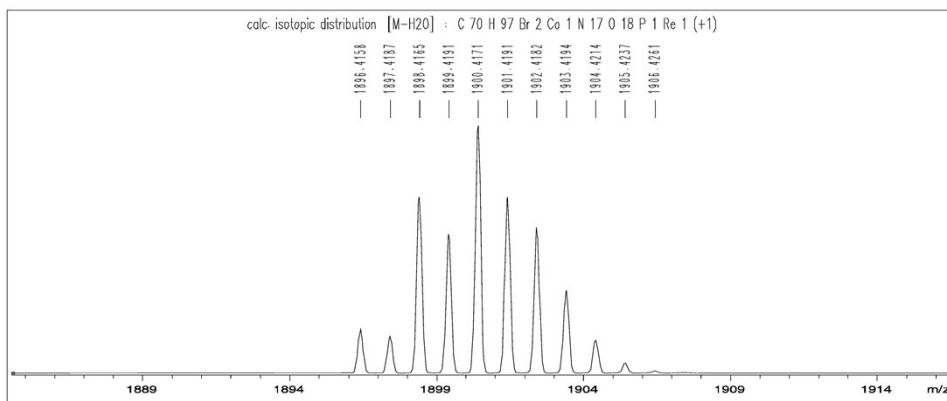

Figure S15. High-Resolution MS of **1b**.

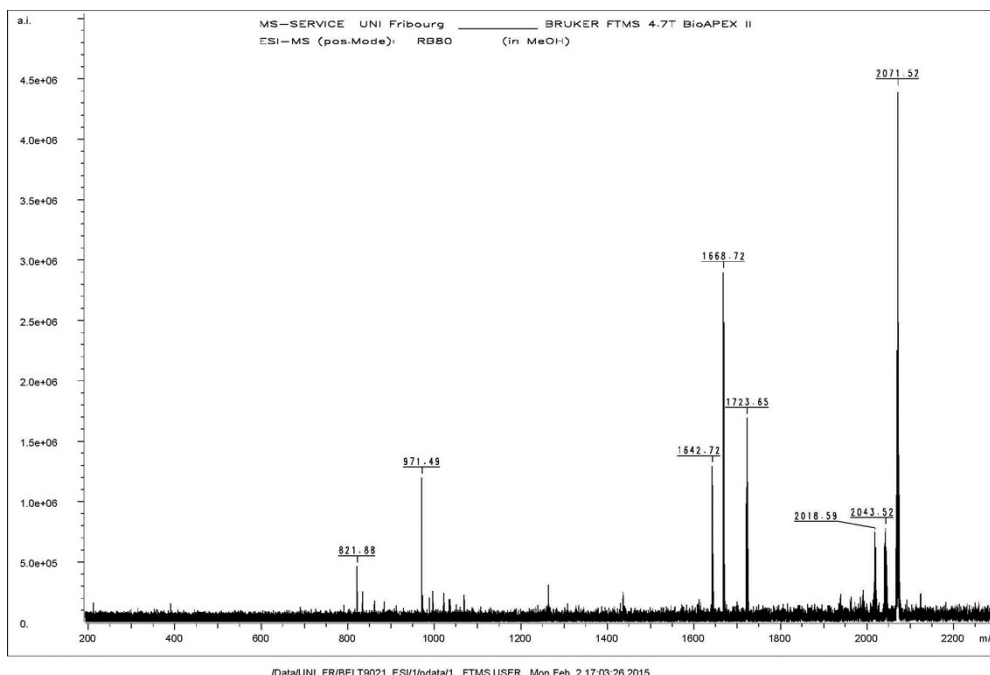

UNI  
FR  
UNIVERSITÉ DE FRIBOURG  
UNIVERSITÄT FREIBURG

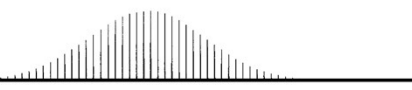

Mass Spectrometry Service  
Department of Chemistry

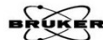

FTMS 4.7T BioAPEX II

RB80

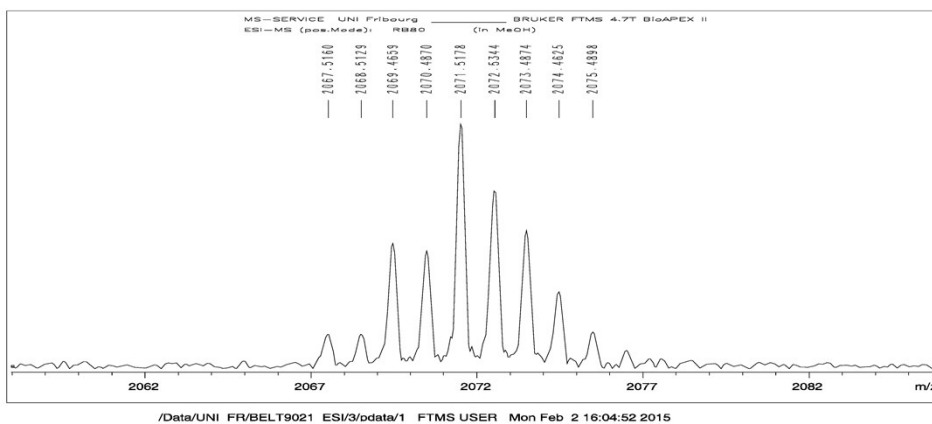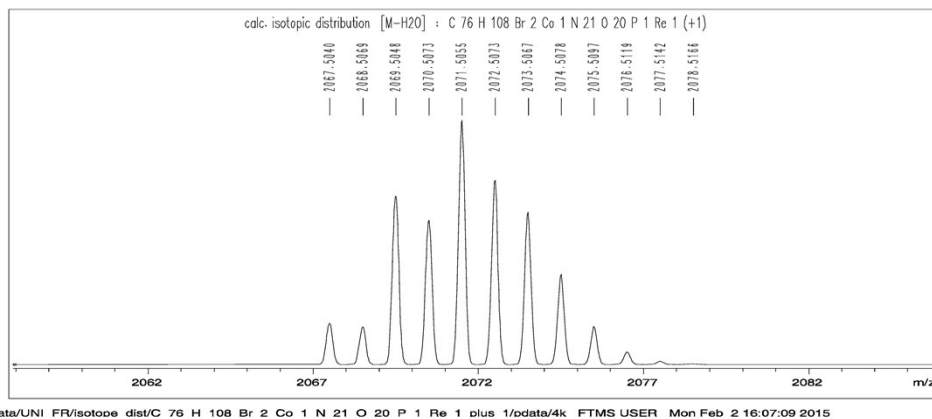

Figure S16. High-Resolution MS of **2b**.

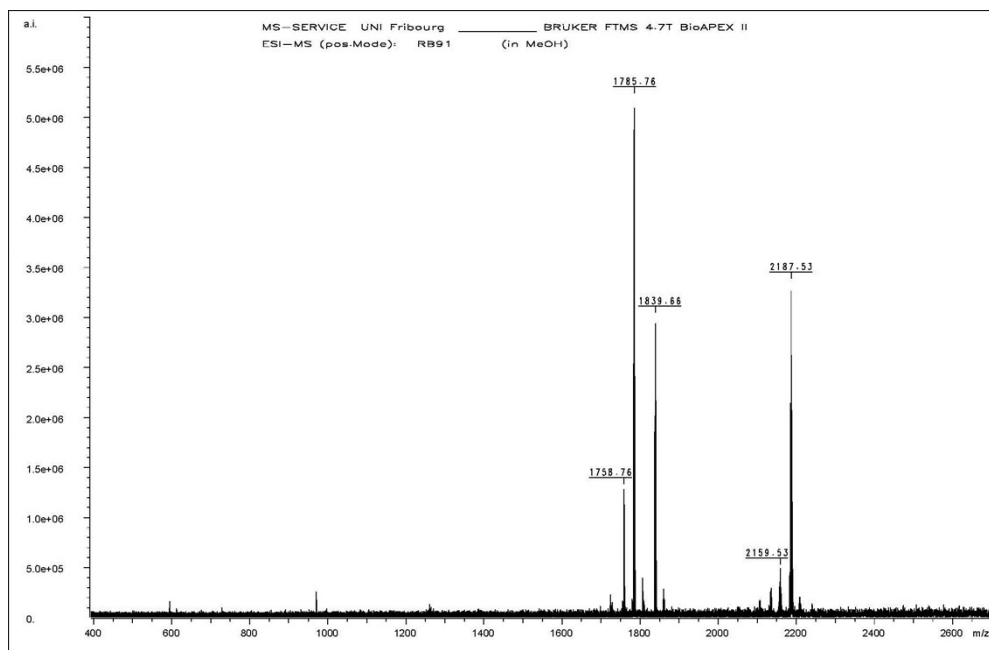

UNI  
FR  
UNIVERSITÉ DE FRIBOURG  
UNIVERSITÄT FREIBURG

Mass Spectrometry Service  
Department of Chemistry

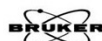

FTMS 4.7T BioAPEX II

RB91

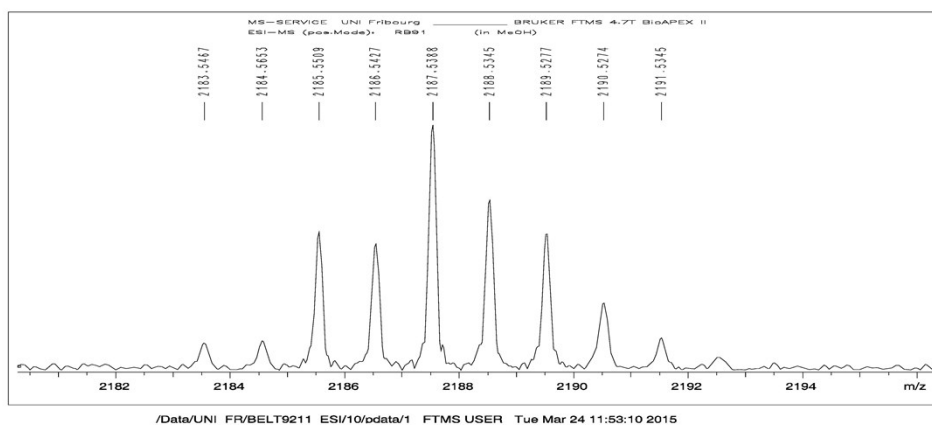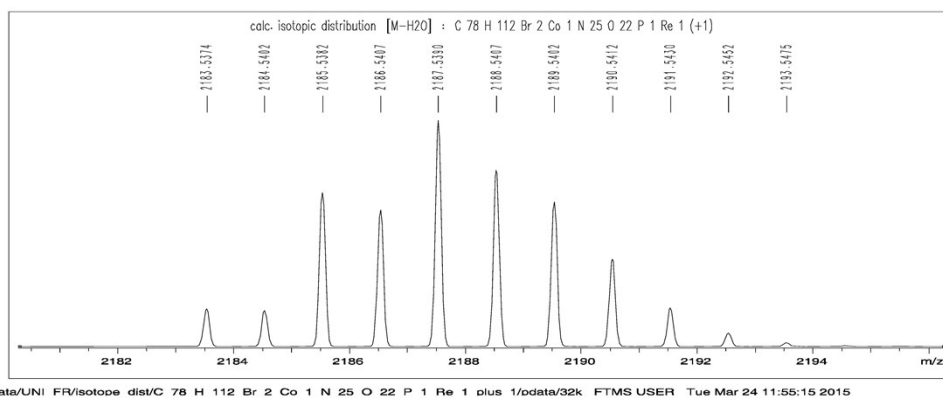

Figure S17. High-Resolution MS of **3b**.

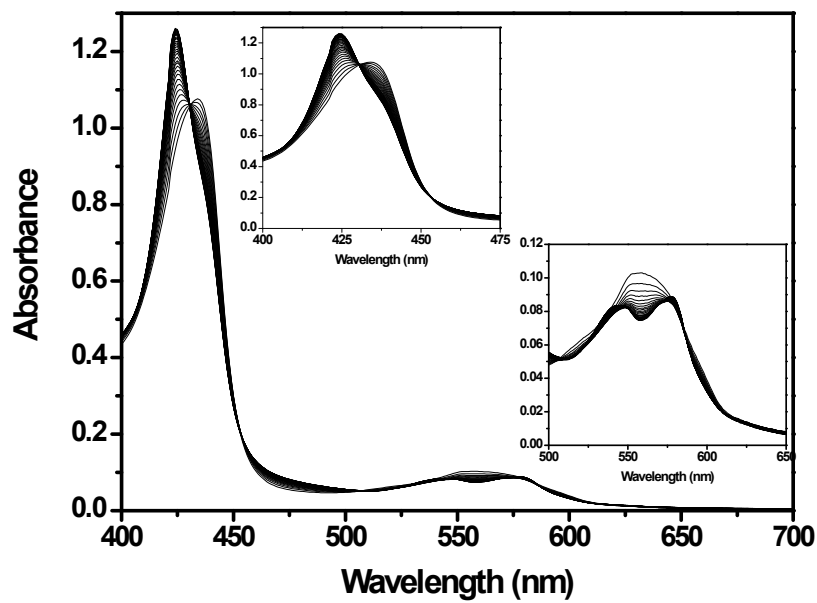

**Figure S18.** Typical spectrum changes on Mb assay of mixed CO/NO releasing molecules.

Shown are the changes of **3b**.
